# Supplementary material
Source: PubMed Central journal article supplement (PMC2998635)
Supplement: mmc1.pdf [file mmc1.pdf]

**Biophysical Journal, Volume 99**

**Supporting Material**

In silico Phosphorylation of the Autoinhibited Form of p47<sup>phox</sup>: Insights into the Mechanism of Activation

Flavia Autore, Bruno Pagano, Arianna Fornili, Katrin Rittinger, and Franca Fraternali

Table S1: Parameters utilised for the HPO<sub>4</sub><sup>-</sup> group

| [ PSO ]       |     |     |        |           |
|---------------|-----|-----|--------|-----------|
| [ atoms ]     |     |     |        |           |
|               | N   | N   | -0.280 | 0         |
|               | H   | H   | 0.280  | 0         |
|               | CA  | CH1 | 0.000  | 1         |
|               | CB  | CH2 | 0.150  | 2         |
|               | OP  | OA  | -0.360 | 2         |
|               | P1  | P   | 0.360  | 2         |
|               | OM1 | OM  | -0.635 | 2         |
|               | OM2 | OM  | -0.635 | 2         |
|               | OM3 | OA  | -0.548 | 2         |
|               | HP  | H   | 0.398  | 2         |
|               | C   | C   | 0.380  | 3         |
|               | O   | O   | -0.380 | 3         |
| [ bonds ]     |     |     |        |           |
|               | N   | H   | gb_2   |           |
|               | N   | CA  | gb_20  |           |
|               | CA  | C   | gb_26  |           |
|               | C   | O   | gb_4   |           |
|               | C   | +N  | gb_9   |           |
|               | CA  | CB  | gb_26  |           |
|               | CB  | OP  | gb_17  |           |
|               | OP  | P1  | gb_27  |           |
|               | P1  | OM1 | gb_23  |           |
|               | P1  | OM2 | gb_23  |           |
|               | P1  | OM3 | gb_27  |           |
|               | HP  | OM3 | gb_1   |           |
| [ angles ]    |     |     |        |           |
|               | -C  | N   | H      | ga_31     |
|               | H   | N   | CA     | ga_17     |
|               | -C  | N   | CA     | ga_30     |
|               | N   | CA  | C      | ga_12     |
|               | CA  | C   | +N     | ga_18     |
|               | CA  | C   | O      | ga_29     |
|               | O   | C   | +N     | ga_32     |
|               | N   | CA  | CB     | ga_12     |
|               | C   | CA  | CB     | ga_12     |
|               | CA  | CB  | OP     | ga_8      |
|               | CB  | OP  | P1     | ga_25     |
|               | OP  | P1  | OM1    | ga_13     |
|               | OP  | P1  | OM2    | ga_13     |
|               | OP  | P1  | OM3    | ga_13     |
|               | P1  | OM3 | HP     | ga_11     |
|               | OM1 | P1  | OM2    | ga_28     |
|               | OM2 | P1  | OM3    | ga_28     |
|               | OM1 | P1  | OM3    | ga_28     |
| [ impropers ] |     |     |        |           |
|               | N   | -C  | CA     | H gi_1    |
|               | C   | CA  | +N     | O gi_1    |
|               | CA  | N   | C      | CB gi_2   |
|               | P   | OP  | OM1    | OM2 gi_2  |
|               | P   | OP  | OP     | OM1 gi_2  |
|               | P   | OP  | OP     | OM2 gi_2  |
| [ dihedrals ] |     |     |        |           |
|               | -CA | -C  | N      | CA gd_4   |
|               | -C  | N   | CA     | C gd_19   |
|               | N   | CA  | C      | +N gd_20  |
|               | CA  | CB  | OP     | P1 gd_12  |
|               | CB  | OP  | P1     | OM2 gd_11 |
|               | CB  | OP  | P1     | OM1 gd_11 |
|               | CB  | OP  | P1     | OM3 gd_11 |
|               | OP  | P1  | OM3    | HP gd_11  |

Table S2: Energy decomposition values for the systems studied

|                                        |      | sSH3<br>(start) | sSH3<br>(20ns)     | sSH3-3P<br>(start) | sSH3-3P<br>(50ns)  | sSH3-3P (ED1)<br>(4ns) | sSH3-DP<br>(20ns)  |
|----------------------------------------|------|-----------------|--------------------|--------------------|--------------------|------------------------|--------------------|
| <b>SH3<sub>A</sub>-SH3<sub>B</sub></b> | Coul | -59 (9)         | <b>-36</b> (8)     | -43 (7)            | <b>-205</b> (18)   | <b>-65</b> (11)        | <b>-103</b> (17)   |
|                                        | LJ   | -135 (8)        | -158 (9)           | -133 (9)           | -148 (12)          | -97 (7)                | -154 (9)           |
| <b>SH3<sub>A</sub>-Polybasic</b>       | Coul | -331 (24)       | <b>-344</b> (20)   | -330 (31)          | <b>-517</b> (31)   | <b>-360</b> (23)       | <b>-230</b> (22)   |
|                                        | LJ   | -252 (16)       | -263 (14)          | -236 (13)          | -457 (22)          | -261 (16)              | -248 (13)          |
| <b>SH3<sub>B</sub>-Polybasic</b>       | Coul | -418 (37)       | <b>-306</b> (22)   | -371 (35)          | <b>-302</b> (30)   | <b>-273</b> (28)       | <b>-431</b> (34)   |
|                                        | LJ   | -283 (17)       | -344 (13)          | -295 (18)          | -293 (14)          | -287 (14)              | -363 (18)          |
| <b>SH3<sub>A</sub>-SOL</b>             | Coul | -3973 (126)     | <b>-4184</b> (113) | -3817 (152)        | <b>-3627</b> (102) | <b>-4016</b> (103)     | <b>-3969</b> (82)  |
|                                        | LJ   | -354 (53)       | -306 (48)          | -371 (46)          | -251 (46)          | -371 (45)              | -329 (50)          |
| <b>SH3<sub>B</sub>-SOL</b>             | Coul | -4438 (263)     | <b>-4437</b> (106) | -4222 (153)        | <b>-4141</b> (133) | <b>-4473</b> (116)     | <b>-4506</b> (102) |
|                                        | LJ   | -225 (52)       | -203 (52)          | -287 (52)          | -243 (48)          | -273 (46)              | -190 (55)          |
| <b>Polybasic-SOL</b>                   | Coul | -3248 (124)     | <b>-2734</b> (118) | -3622 (121)        | <b>-3281</b> (126) | <b>-3497</b> (163)     | <b>-3072</b> (111) |
|                                        | LJ   | -591 (51)       | -511 (48)          | -600 (51)          | -451 (55)          | -637 (53)              | -580 (52)          |

Energies in ( $kJ mol^{-1}$ ) fluctuations in parenthesis. Highlighted in bold are the most important changes observed.

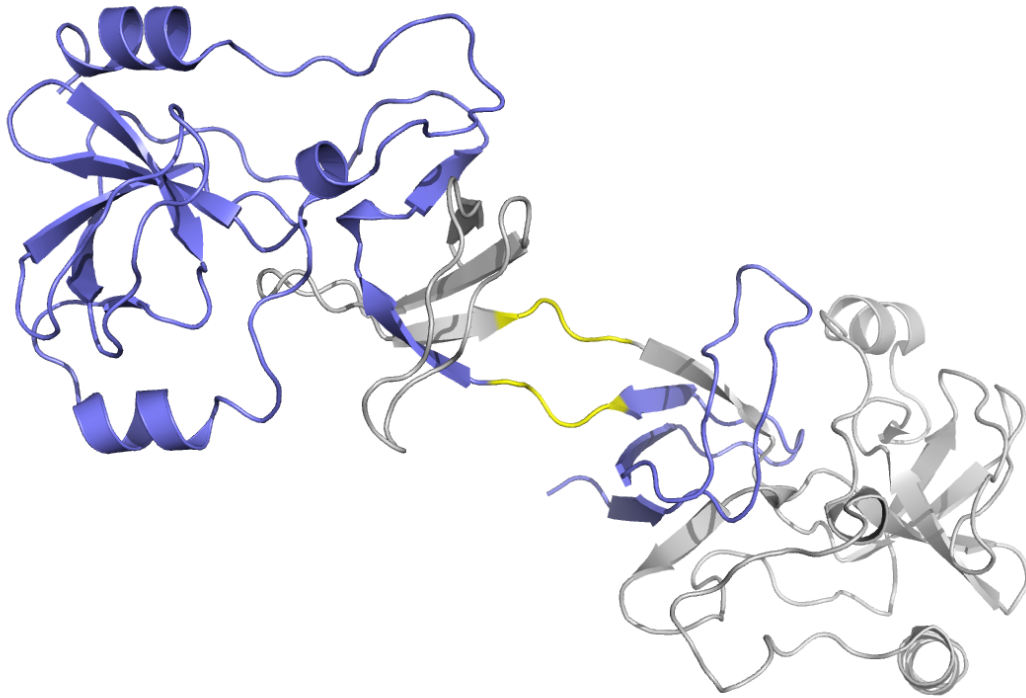

**Fig. S1.** Structure of p47<sup>phox</sup> that crystallized as a domain swapped dimer (PDB 1NG2). The domain swapped monomer is shown in blue with the symmetry-related molecule that was used to create the biologically relevant monomer in grey. Residues 198-201 of the distal loop, which were modelled to create the biological monomer are highlighted in yellow.

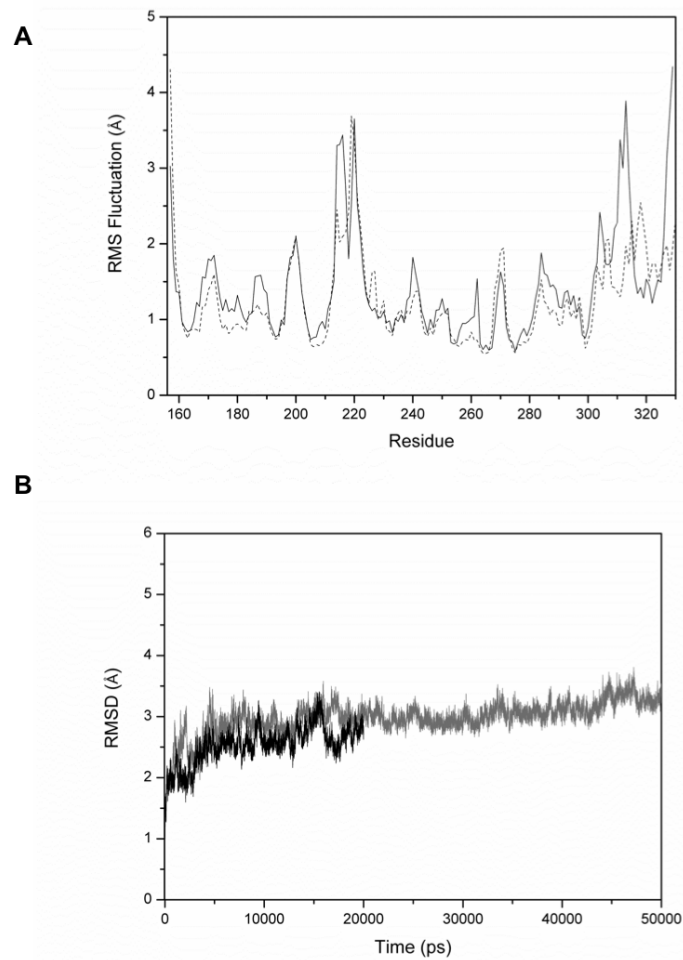

**Fig. S2.** (A) RMSF of the protein backbone with respect to the average position over the entire simulation for sSH3 (*dashed-dotted line*) and for sSH3-3P (*solid line*). (B) RMSD of the C $\alpha$  atoms from their initial coordinates as function of time of sSH3 (*black line*) and sSH3-3P (*gray line*).

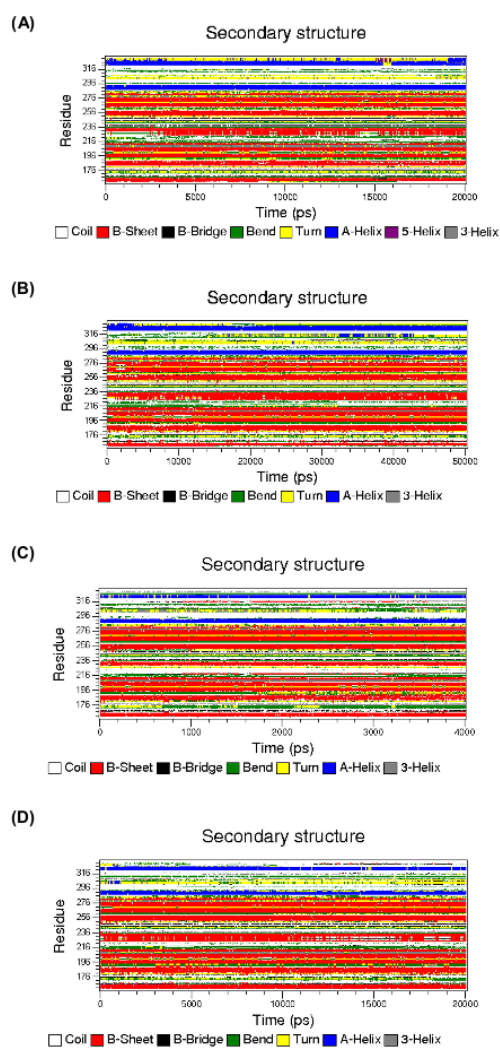

**Fig. S3.** Time evolution of the secondary structure elements during MD simulations of (A) sSH3, (B) sSH3-3P, (C) ED1ev and (D) sSH3-DP. Secondary structure elements at a given time point as determined by DSSP are colored following the scheme:  $\alpha$ -helices in blue;  $\beta$ -sheets in red; turns in yellow; bends in green.

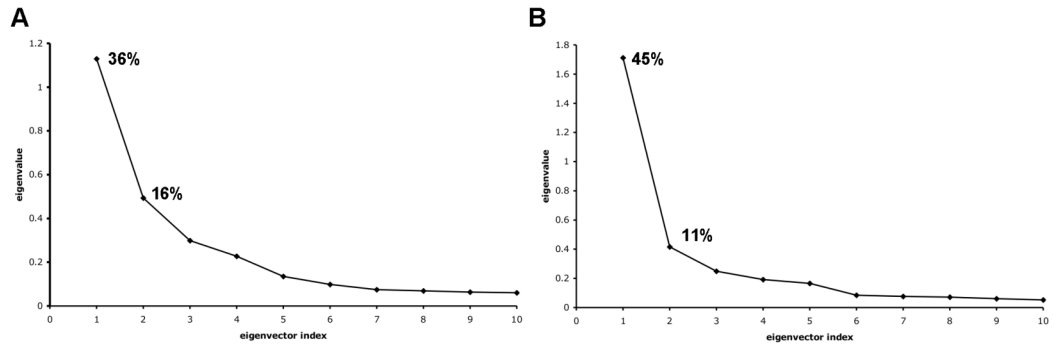

**Fig. S4.** Eigenvalues as a function of the eigenvector index obtained from essential dynamics analyses for (A) sSH3 and (B) sSH3-3P. Only the first 10 largest eigenvalues are shown out of a total of 528.

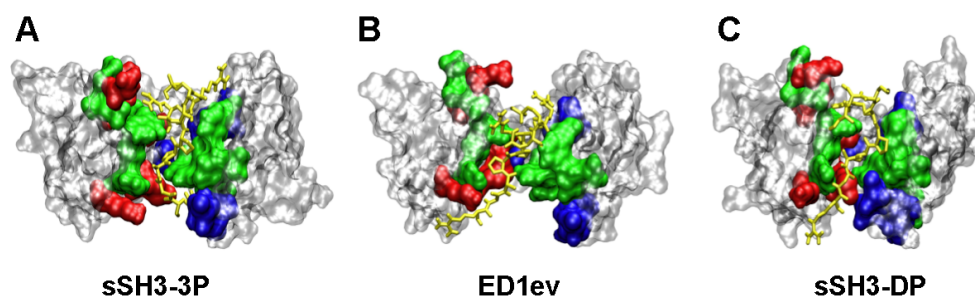

**Fig. S5.** Surface representation of (A) sSH3-3P, (B) ED1ev and (C) sSH3-DP structures at the end of the corresponding simulated time. The molecular surfaces of the residues in contact with the polybasic region (within 5Å) of SH3<sub>A</sub> and SH3<sub>B</sub> are displayed in blue and red, respectively. The residues that interact with p22<sup>phox</sup> are highlighted in green (see Table 2). In licorice (*yellow*) the residues of the PBR/AIR region are shown.



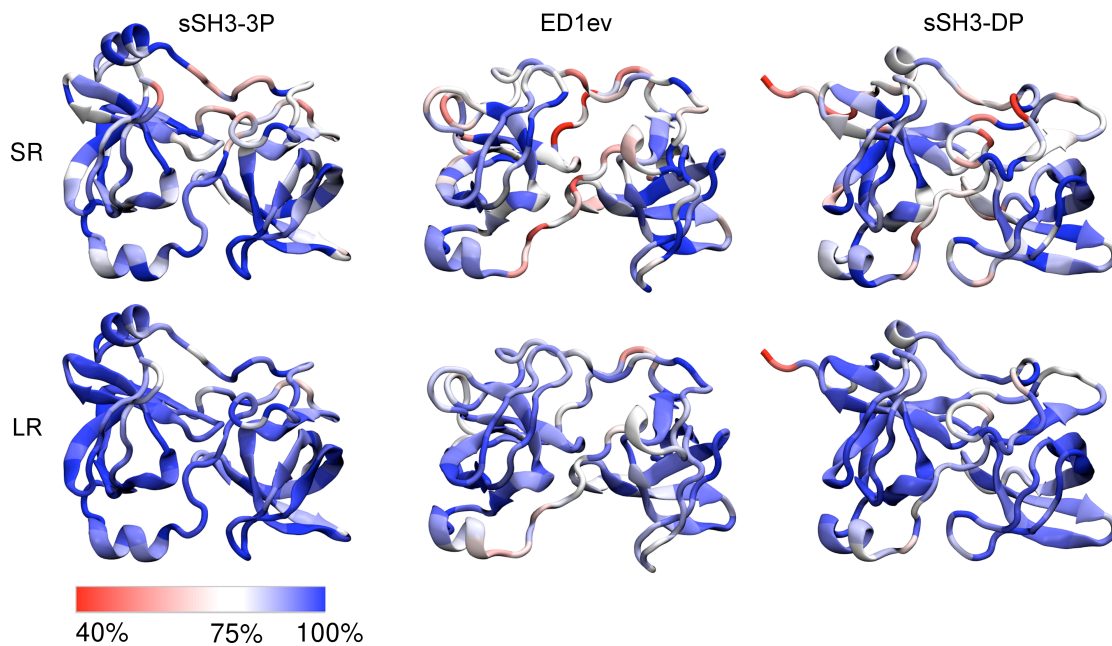

**Fig S6.** Percentage of conserved native contacts color-mapped onto sSH3-3P (*left*), ED1ev (*middle*) and sSH3-DP (*right*). Short-range (*upper panel*) and long-range (*lower panel*) contacts are reported for each residue using a 6-Å and a 15-Å cutoff, respectively. The distance between residues is calculated as the minimum distance over all the atom pairs. The colour scale ranges from red (low conservation) to blue (high conservation).
